# Supplementary material
Source: PubMed Central journal article supplement (PMC7212772)
Supplement: NIHMS1576506-supplement-1.pdf [file NIHMS1576506-supplement-1.pdf]

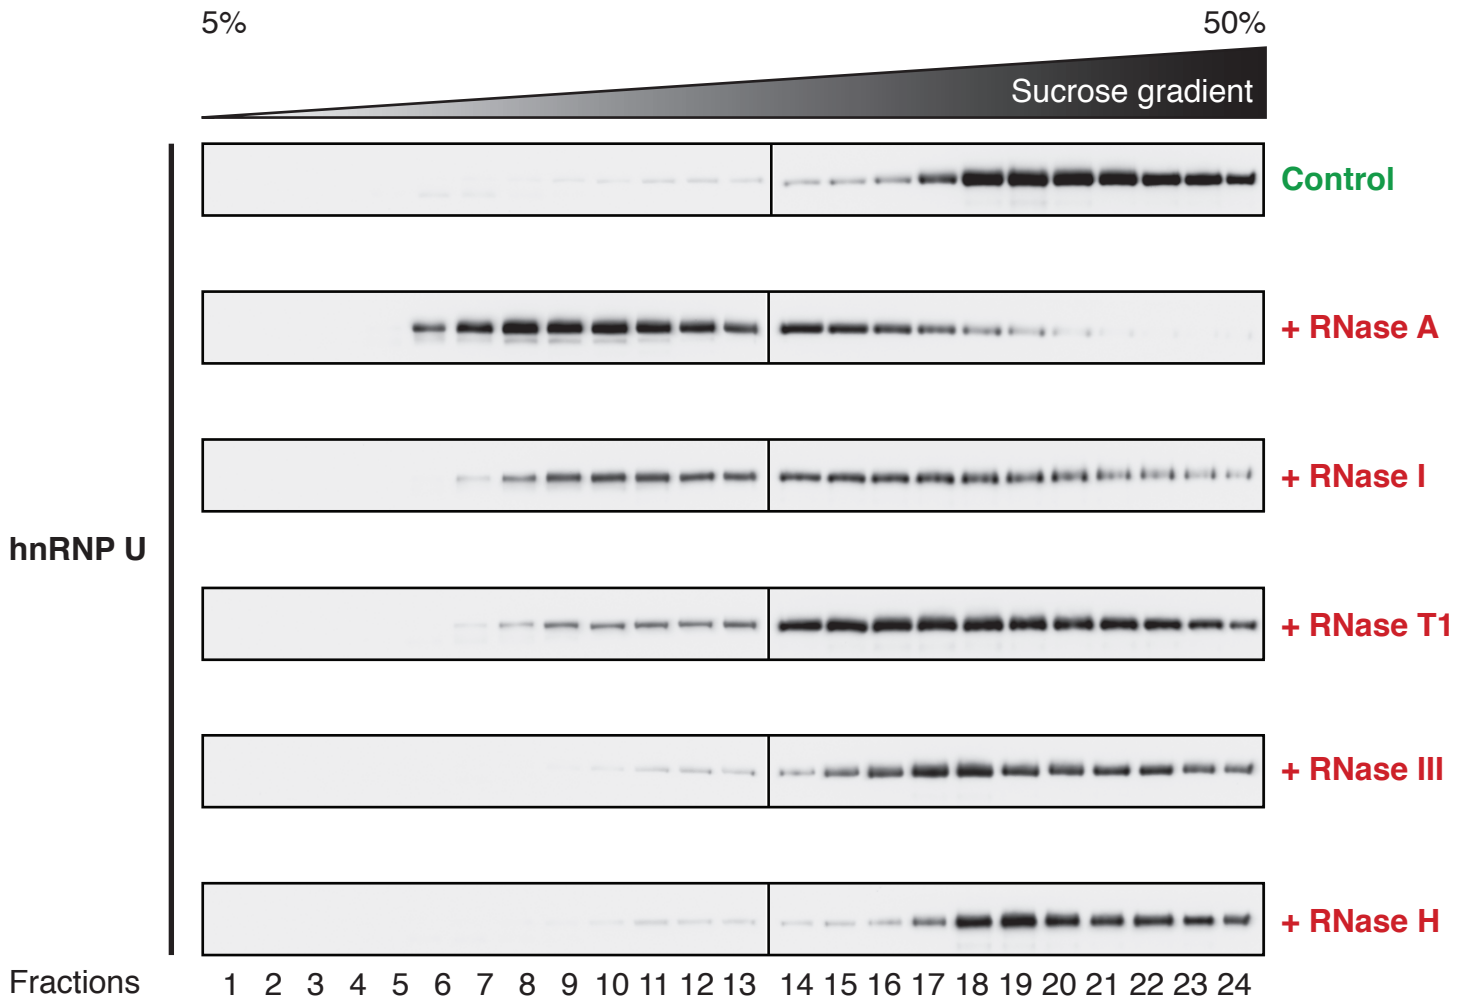

Caudron-Herger et al. Supplementary Fig. 1

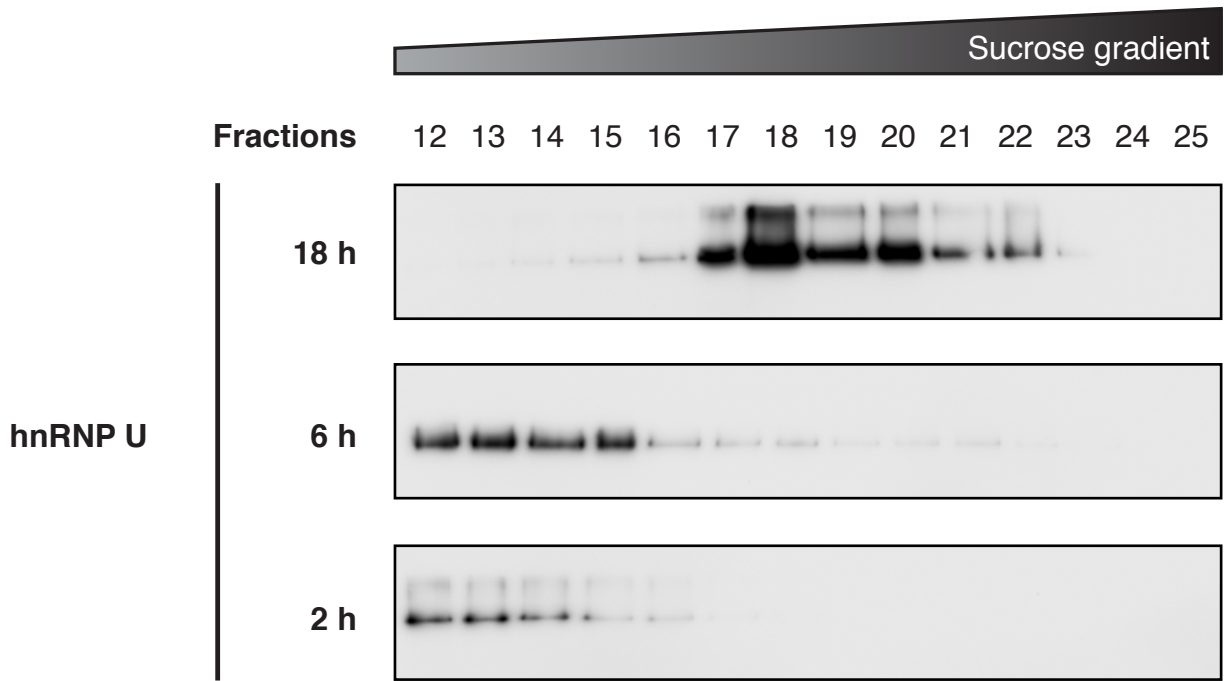

Caudron-Herger et al. Supplementary Fig. 2

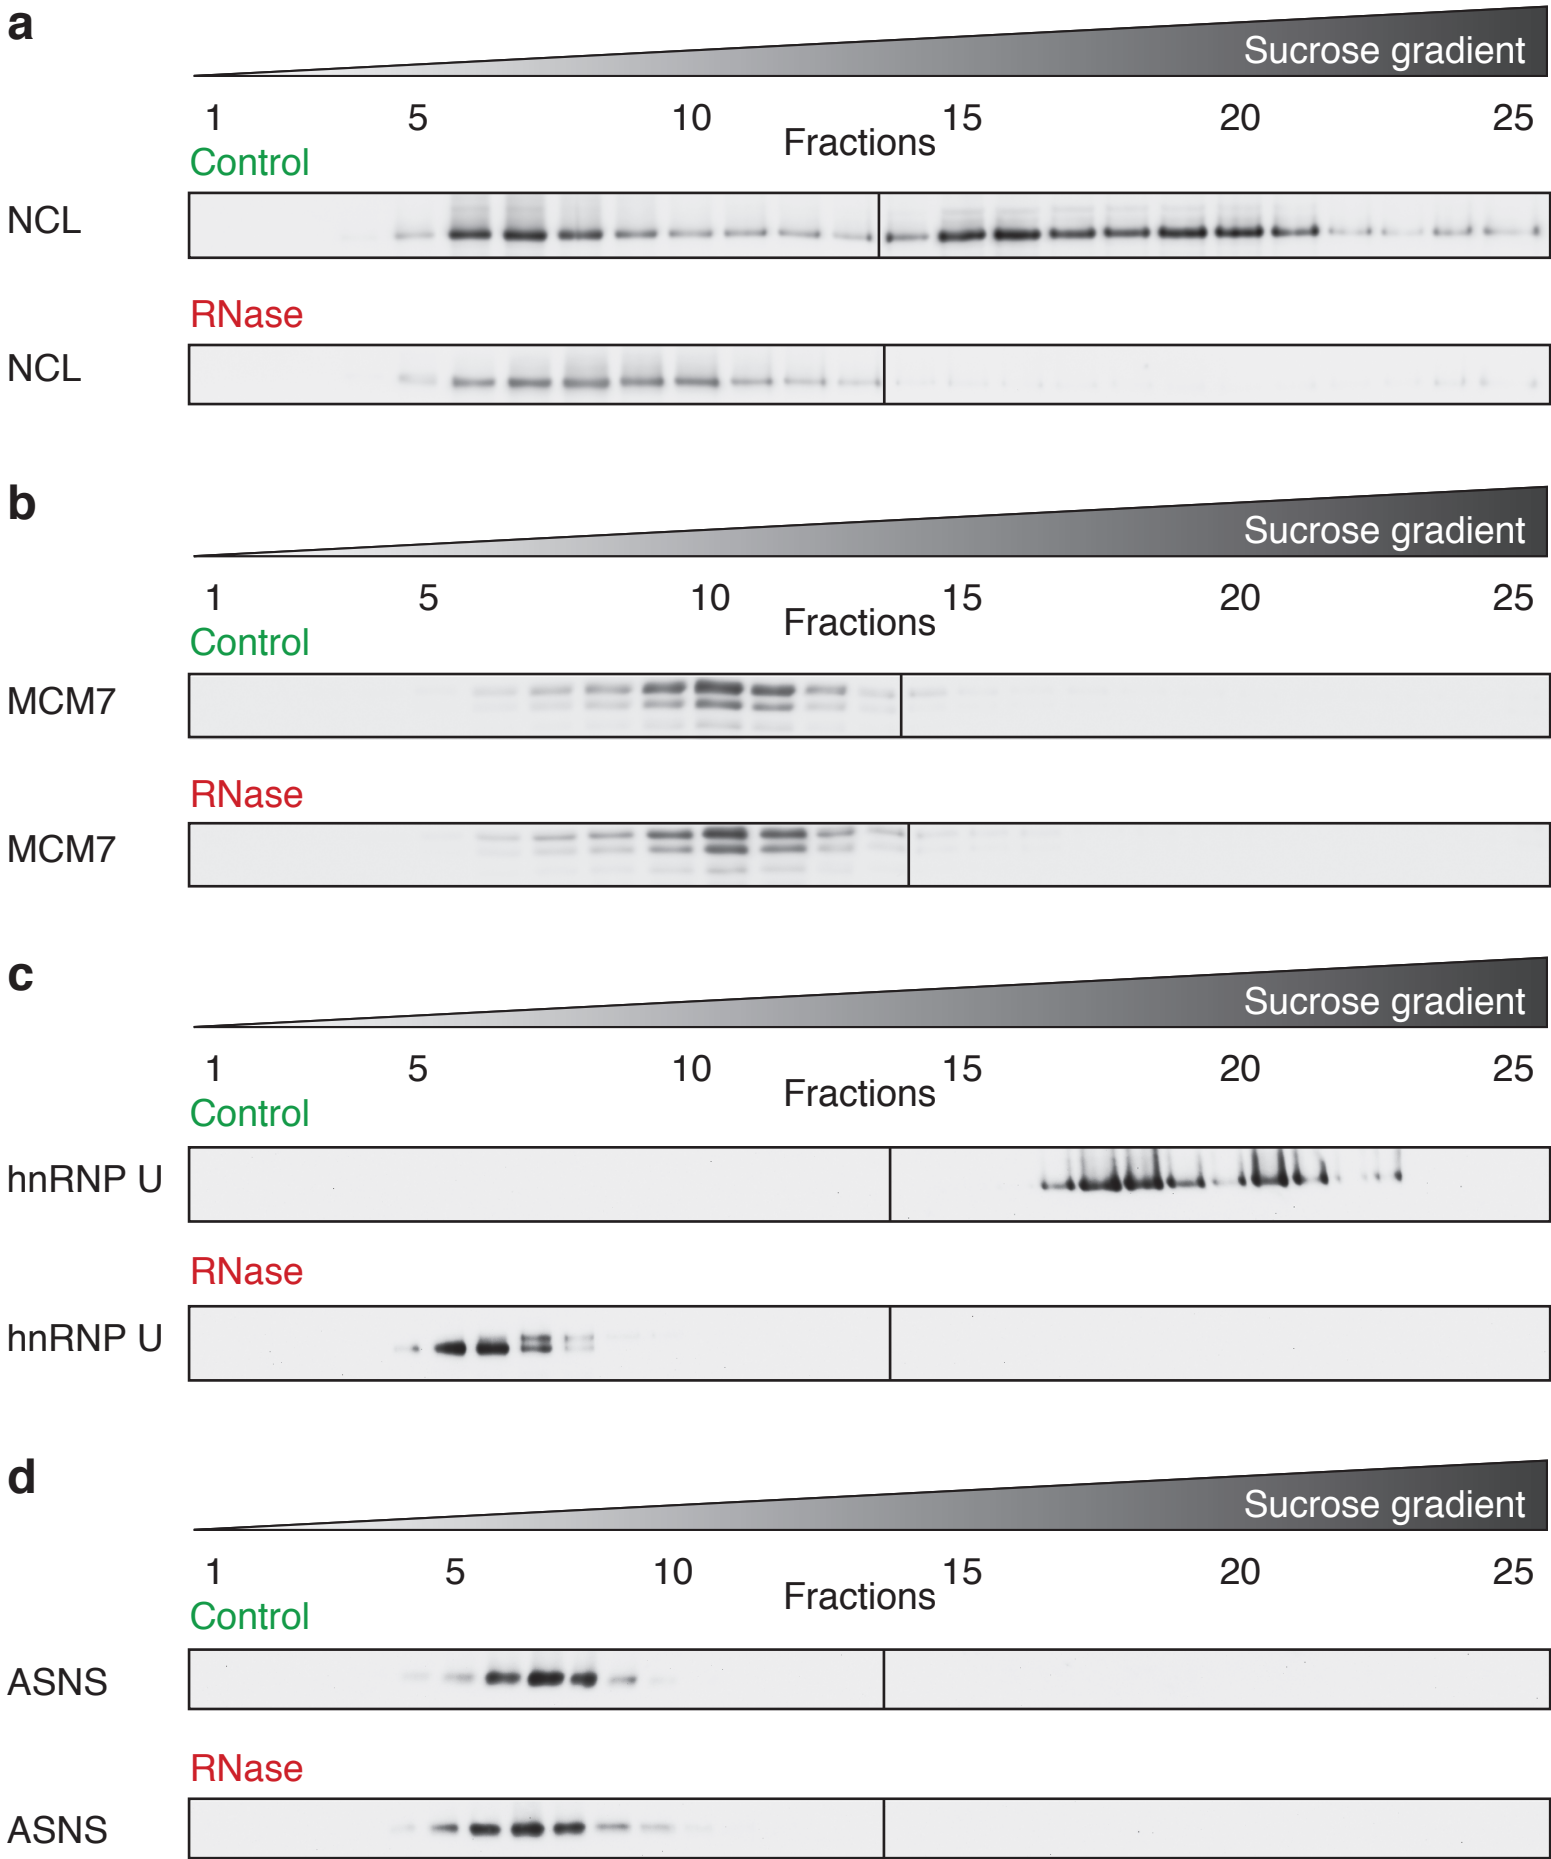

Caudron-Herger et al. Supplementary Fig. 3

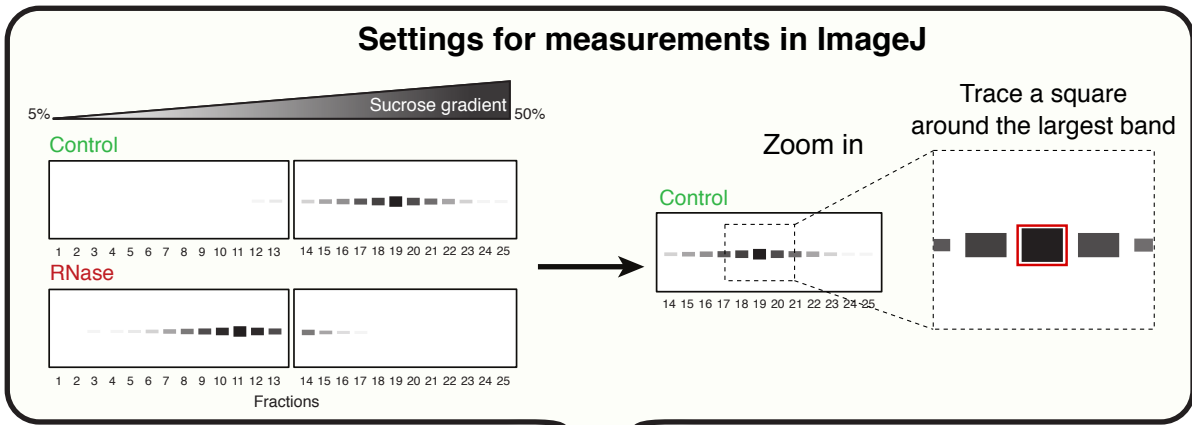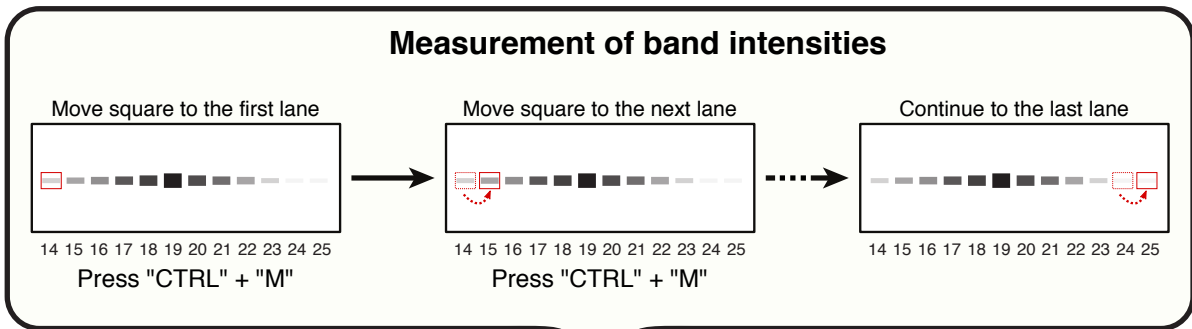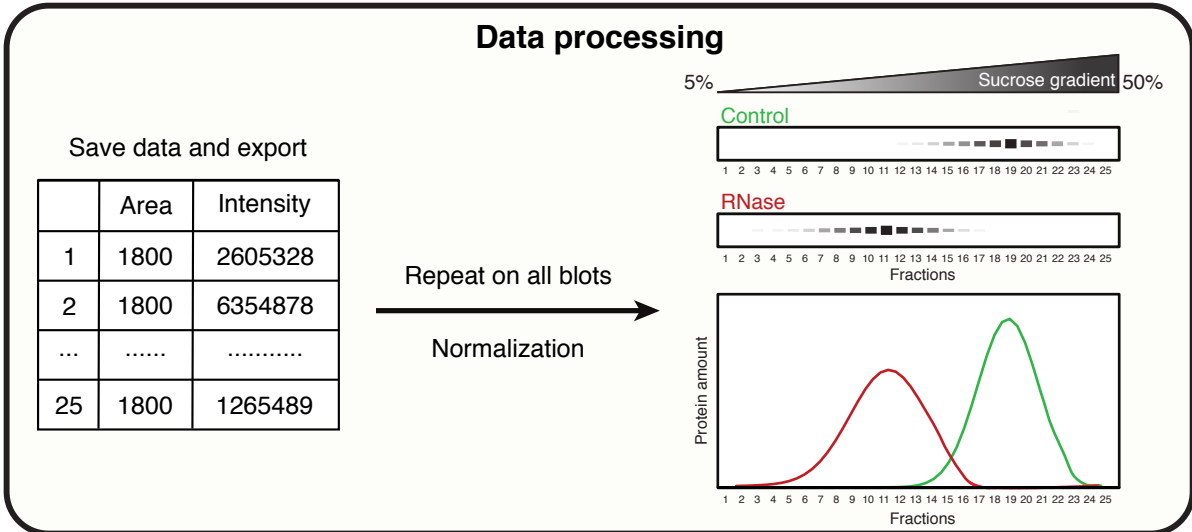

Caudron-Herger et al. Supplementary Fig. 4
